# Supplementary material for: Inhibitory Effects of Nitrogenous Metabolites from a Marine-Derived Streptomyces bacillaris on Isocitrate Lyase of Candida albicans
Source: Mar Drugs. 2022 Feb 13;20(2):138. doi: 10.3390/md20020138 (PMC8878140; doi:10.3390/md20020138)
Supplement: Supplementary file 1 [file marinedrugs-20-00138-s001.zip › marinedrugs-1588795-supplementary.pdf]

## ***Supporting Information***

### **Inhibitory Effects of Nitrogenous Metabolites from a Marine-derived *Streptomyces bacillaris* on Isocitrate Lyase of *Candida albicans***

Beomkoo Chung <sup>1</sup>, Ji-Yeon Hwang <sup>2</sup>, Sung Chul Park <sup>2</sup>, Oh-Seok Kwon <sup>2</sup>, Eunji Cho <sup>1</sup>, Jayho Lee <sup>1</sup>, Hyi-Seung Lee <sup>3</sup>, Dong-Chan Oh <sup>2</sup>, Jongheon Shin <sup>2,\*</sup> and Ki-Bong Oh <sup>1,\*</sup>

<sup>1</sup> Department of Agricultural Biotechnology, College of Agriculture and Life Sciences, Seoul National University, Seoul 08826, Korea

<sup>2</sup> Natural Products Research Institute, College of Pharmacy, Seoul National University, Seoul 08826, Korea

<sup>3</sup> Marine Natural Products Chemistry Laboratory, Korea Institute of Ocean Science and Technology, Busan 49111, Korea

## Contents

|                                                                                                                           |     |
|---------------------------------------------------------------------------------------------------------------------------|-----|
| <b>Figure S1.</b> The $^1\text{H}$ NMR (800 MHz, DMSO- $d_6$ ) spectrum of <b>1</b>                                       | S3  |
| <b>Figure S2.</b> The $^{13}\text{C}$ NMR (200 MHz, DMSO- $d_6$ ) spectrum of <b>1</b>                                    | S4  |
| <b>Figure S3.</b> The COSY (500 MHz, DMSO- $d_6$ ) spectrum of <b>1</b>                                                   | S5  |
| <b>Figure S4.</b> The HSQC (800 MHz, DMSO- $d_6$ ) spectrum of <b>1</b>                                                   | S6  |
| <b>Figure S5.</b> The HMBC (800 MHz, DMSO- $d_6$ ) spectrum of <b>1</b>                                                   | S7  |
| <b>Figure S6.</b> The NOESY (600 MHz, DMSO- $d_6$ ) spectrum of <b>1</b>                                                  | S8  |
| <b>Figure S7.</b> The $^1\text{H}$ NMR (500 MHz, MeOH- $d_4$ ) spectrum of <b>1</b>                                       | S9  |
| <b>Figure S8.</b> HR-ESI-MS data of <b>1</b>                                                                              | S10 |
| <b>Figure S9.</b> The $^1\text{H}$ NMR (800 MHz, DMSO- $d_6$ ) spectrum of <b>1a</b>                                      | S11 |
| <b>Figure S10.</b> The $^{13}\text{C}$ NMR (200 MHz, DMSO- $d_6$ ) spectrum of <b>1a</b>                                  | S12 |
| <b>Figure S11.</b> The NOESY (800 MHz, DMSO- $d_6$ ) spectrum of <b>1a</b>                                                | S13 |
| <b>Figure S12.</b> HR-ESI-MS data of <b>1a</b>                                                                            | S14 |
| <b>Figure S13.</b> The $^1\text{H}$ NMR (600 MHz, DMSO- $d_6$ ) spectrum of <b>2</b>                                      | S15 |
| <b>Figure S14.</b> The $^{13}\text{C}$ NMR (150 MHz, DMSO- $d_6$ ) spectrum of <b>2</b>                                   | S16 |
| <b>Figure S15.</b> The COSY (600 MHz, DMSO- $d_6$ ) spectrum of <b>2</b>                                                  | S17 |
| <b>Figure S16.</b> The HSQC (600 MHz, DMSO- $d_6$ ) spectrum of <b>2</b>                                                  | S18 |
| <b>Figure S17.</b> The HMBC (600 MHz, DMSO- $d_6$ ) spectrum of <b>2</b>                                                  | S19 |
| <b>Figure S18.</b> HR-ESI-MS data of <b>2</b>                                                                             | S20 |
| <b>Figure S19.</b> The $^1\text{H}$ NMR (800 MHz, DMSO- $d_6$ ) spectrum ( $\delta_{\text{H}}$ 1.3 – 2.4 ppm) of <b>1</b> | S21 |
| <b>Figure S20.</b> The $^1\text{H}$ NMR (600 MHz, DMSO- $d_6$ ) spectrum ( $\delta_{\text{H}}$ 2.7 – 3.8 ppm) of <b>2</b> | S22 |

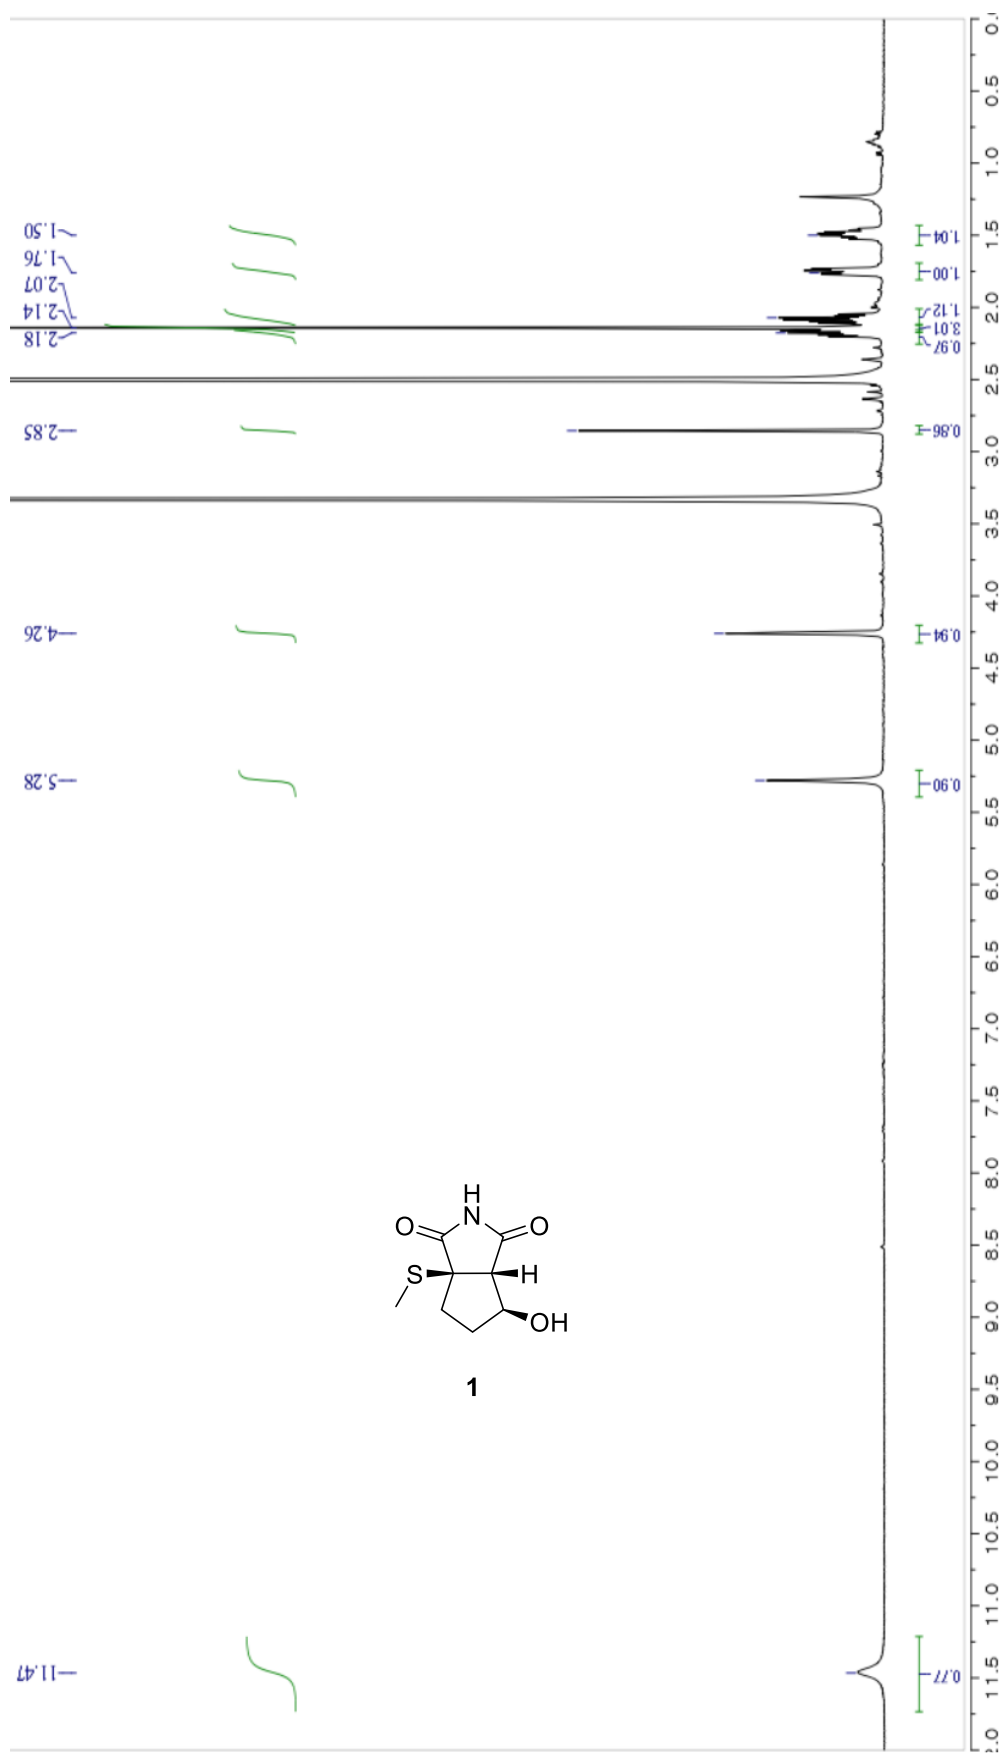

**Figure S1.** The <sup>1</sup>H NMR (800 MHz, DMSO-*d*<sub>6</sub>) spectrum of **1**.

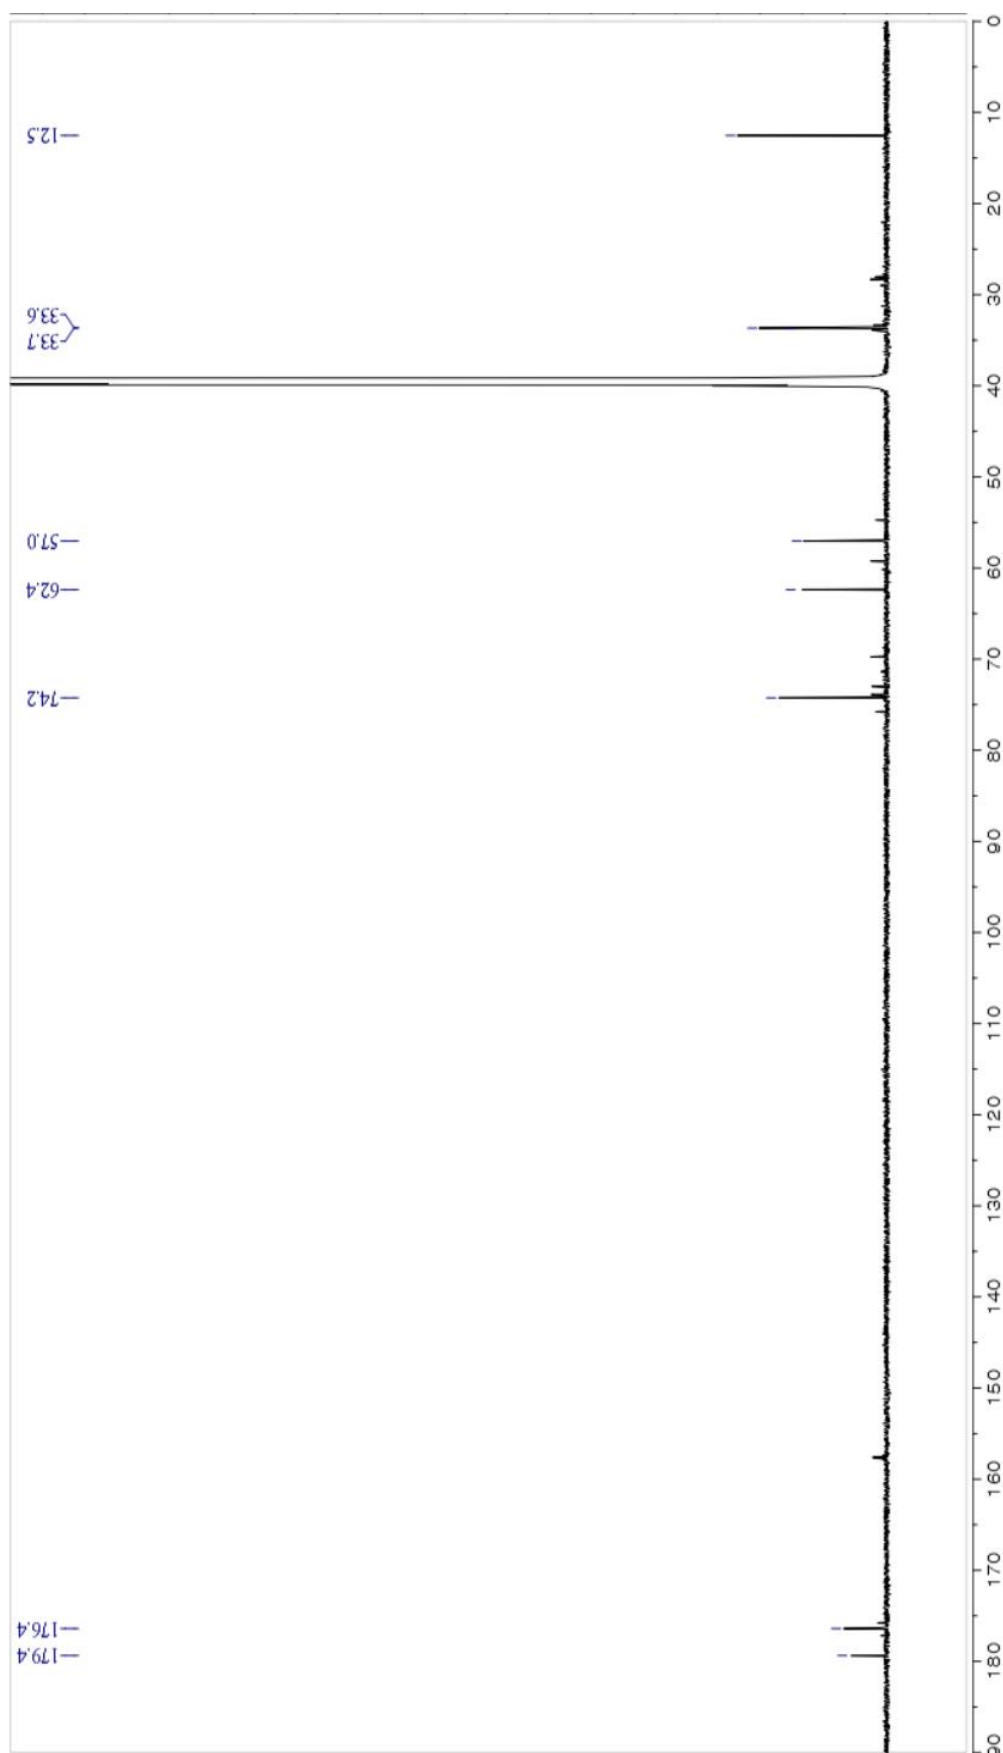

**Figure S2.** The  $^{13}\text{C}$  NMR (200 MHz,  $\text{DMSO}-d_6$ ) spectrum of **1**.

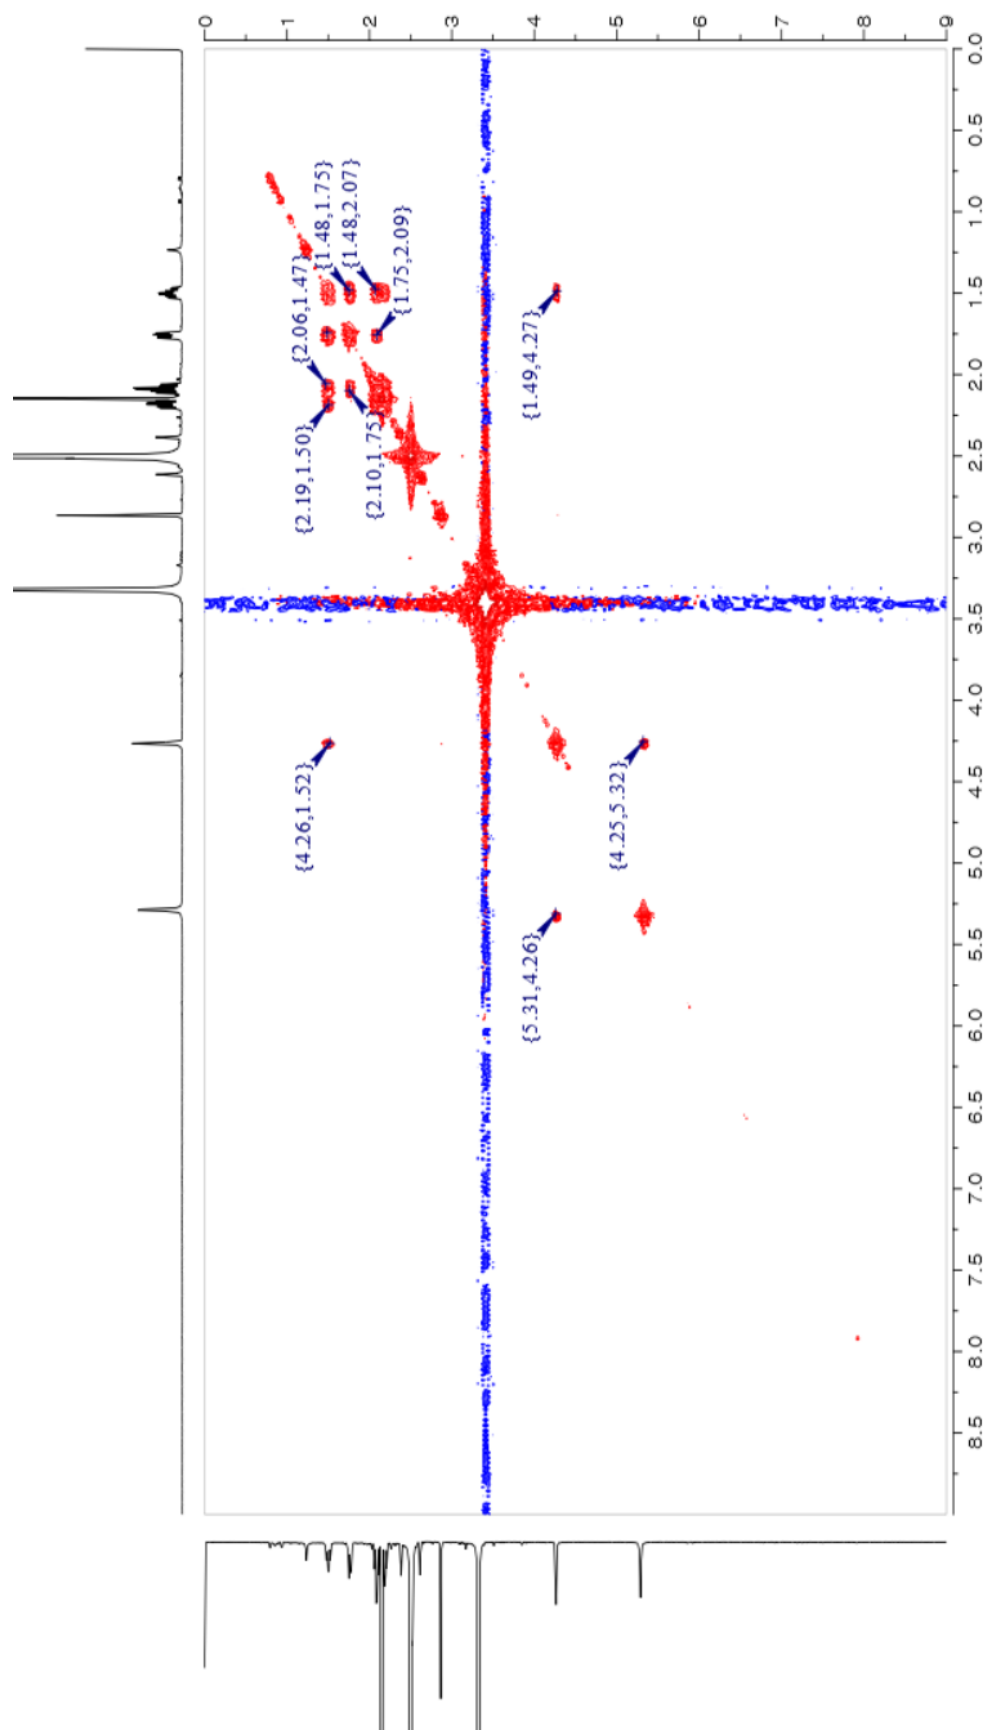

**Figure S3.** The COSY (500 MHz, DMSO- $d_6$ ) spectrum of **1**.

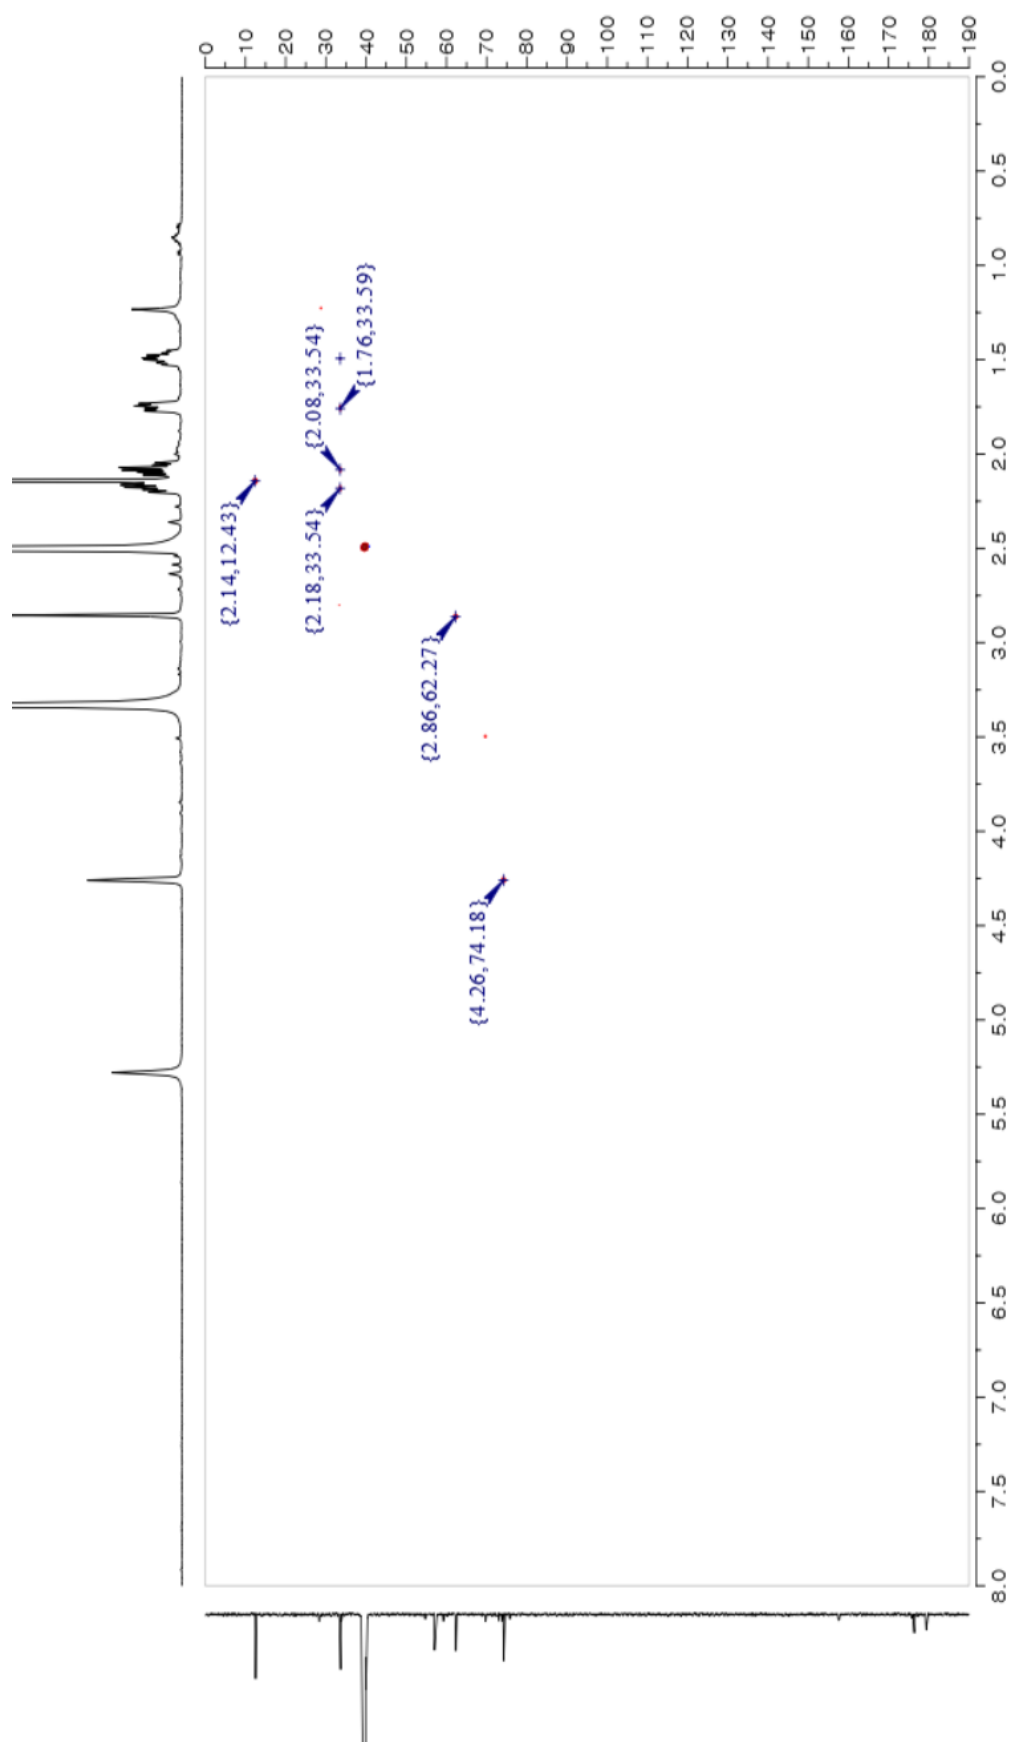

**Figure S4.** The HSQC (800 MHz, DMSO- $d_6$ ) spectrum of **1**.

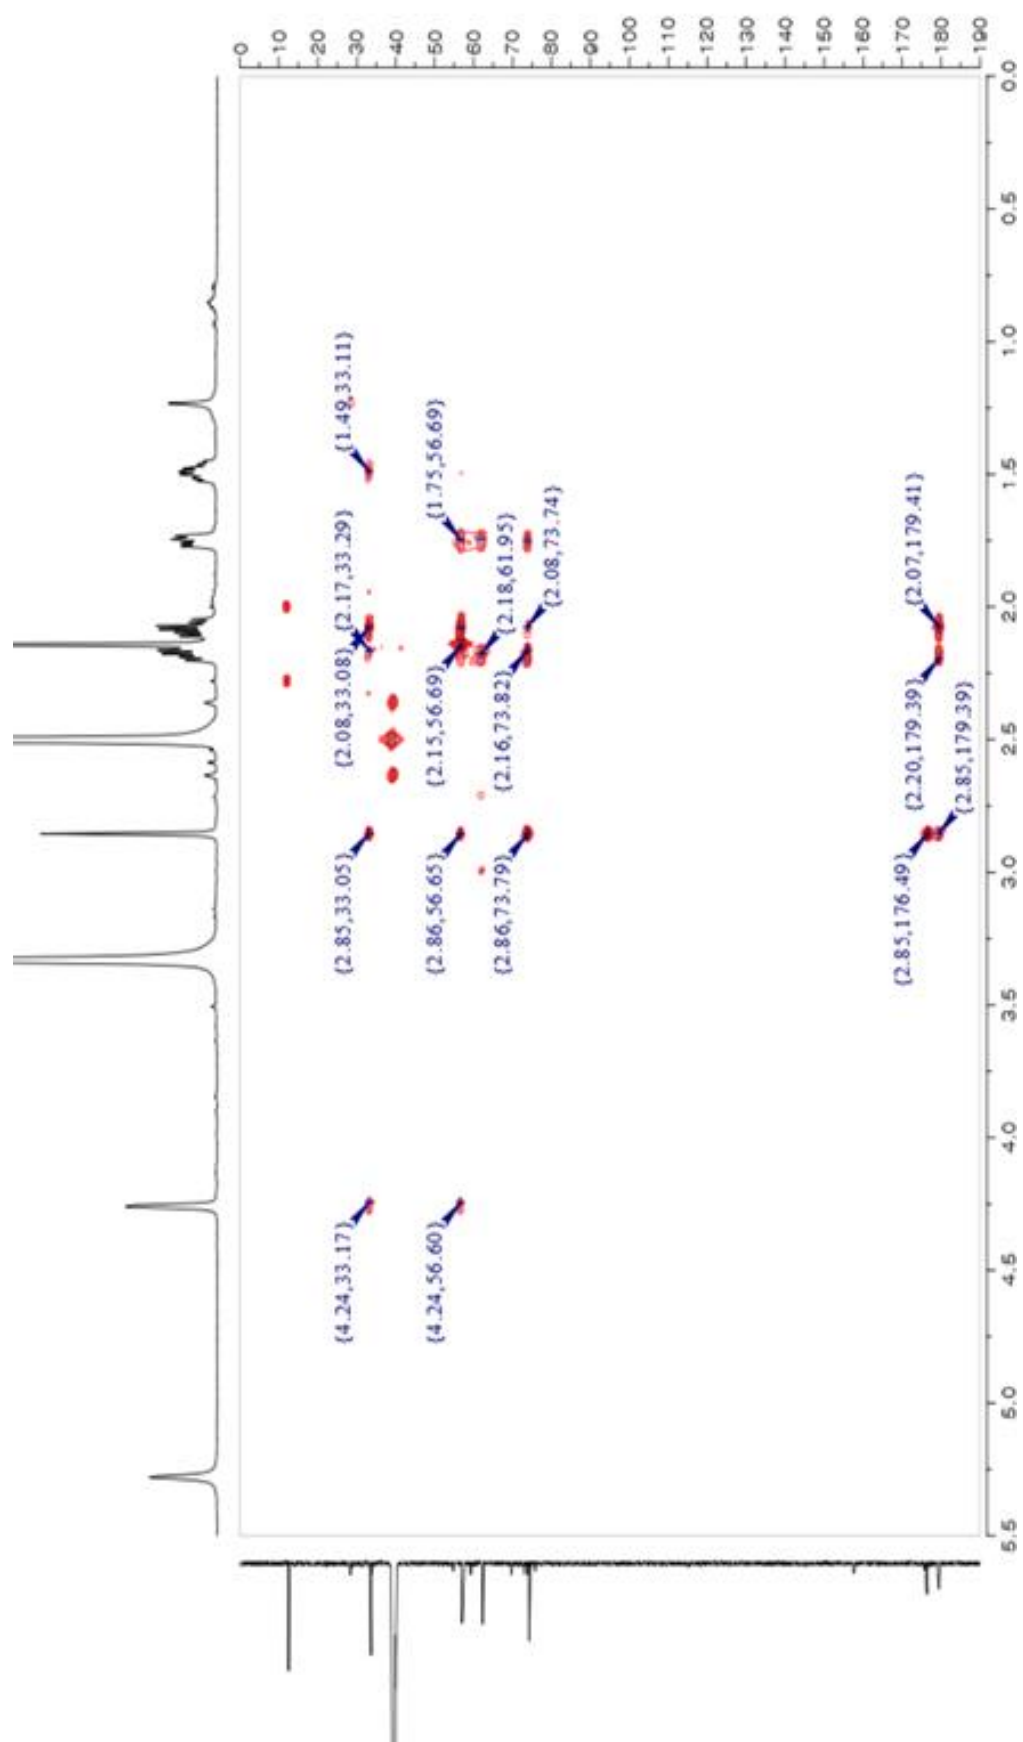

**Figure S5.** The HMBC (800 MHz, DMSO- $d_6$ ) spectrum of **1**.

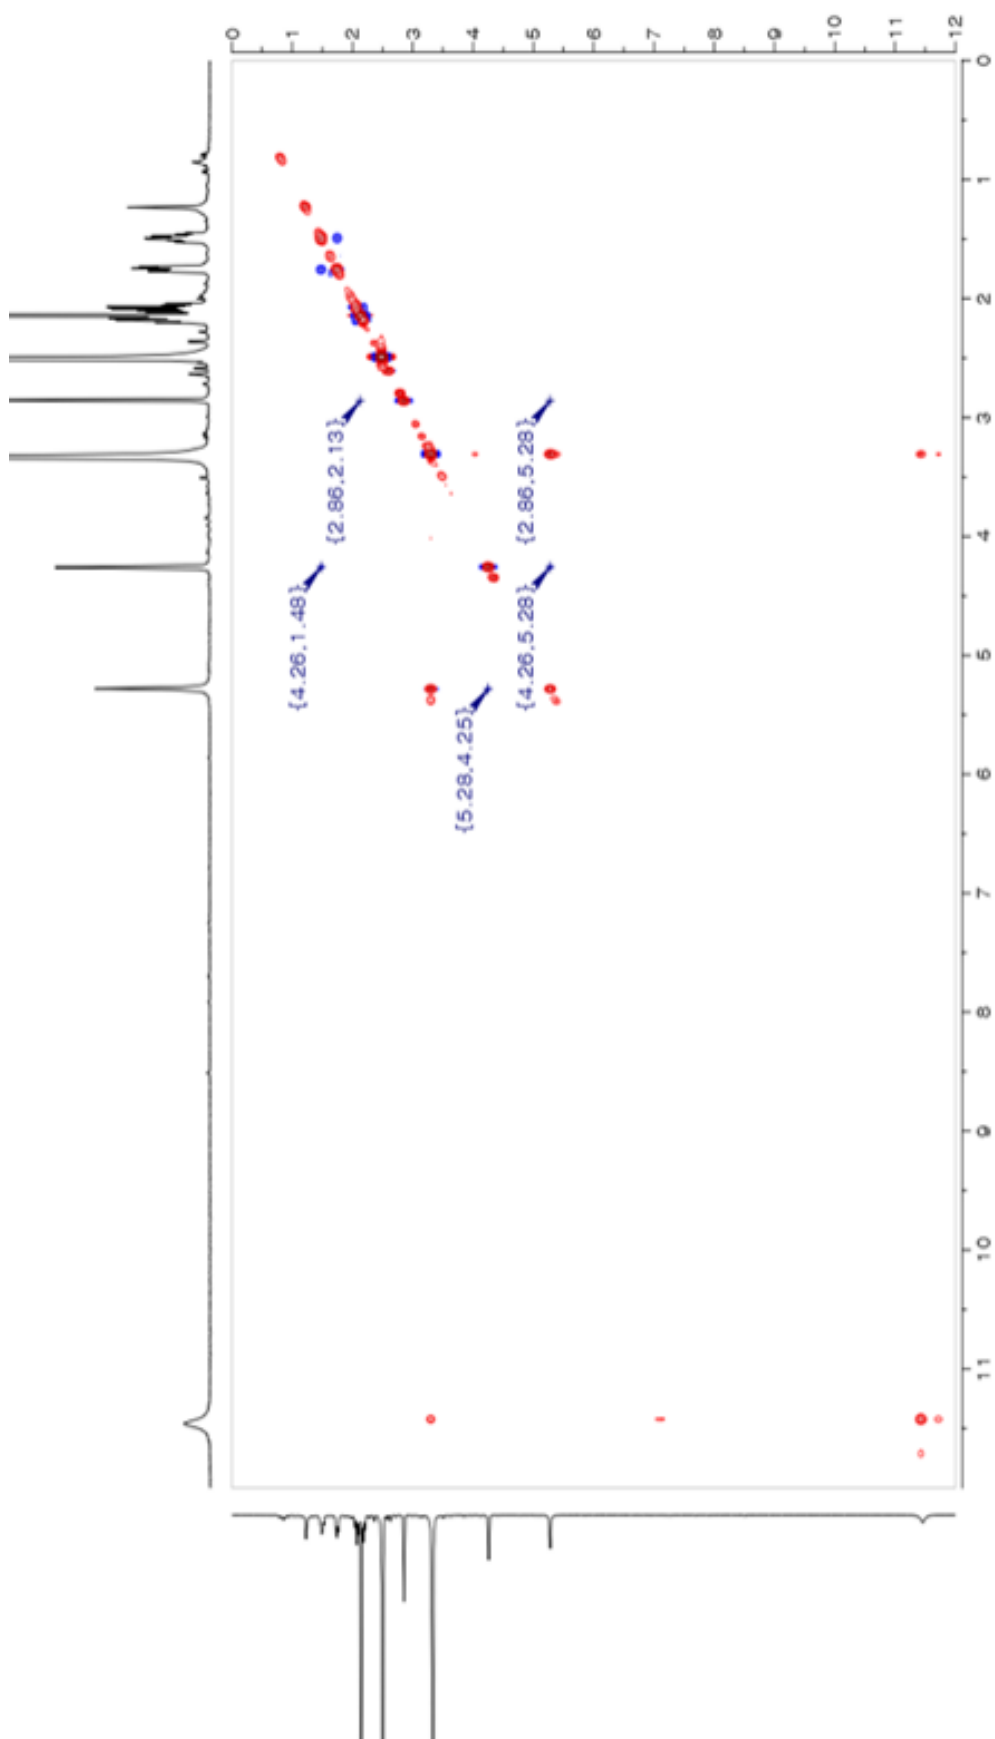

**Figure S6.** The NOESY (600 MHz, DMSO-*d*<sub>6</sub>) spectrum of **1**.

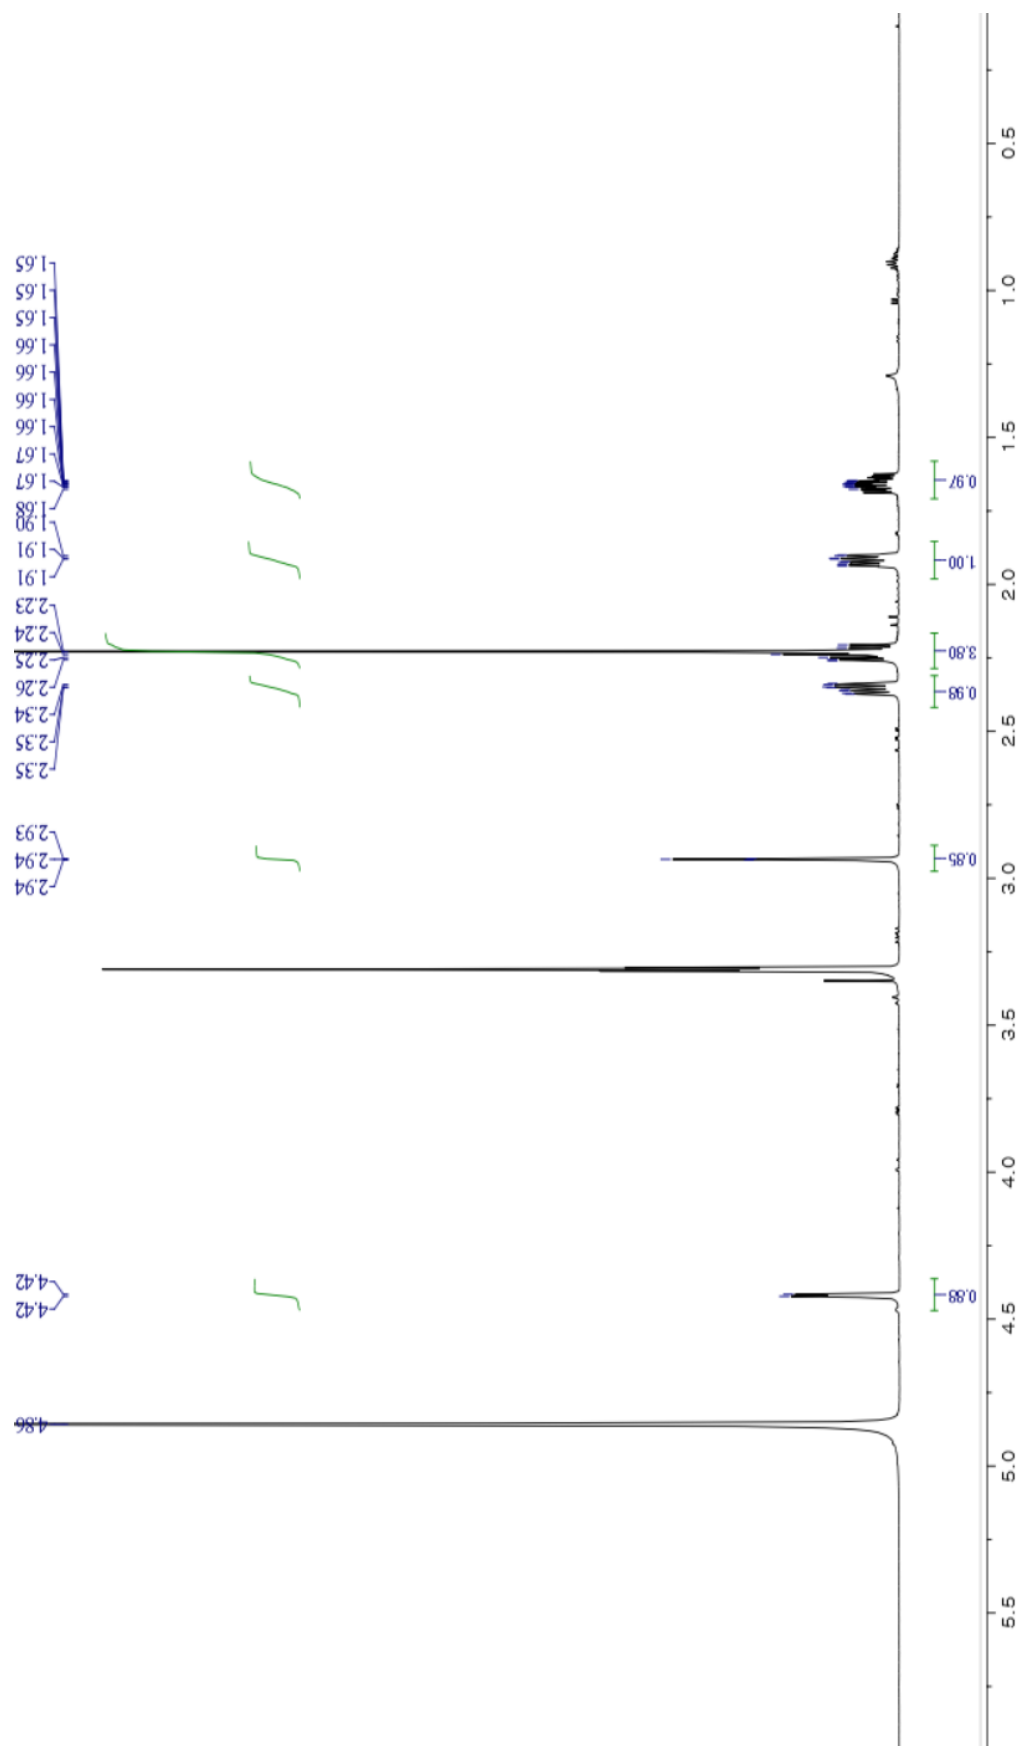

**Figure S7.** The  $^1\text{H}$  NMR (500 MHz,  $\text{MeOH-}d_4$ ) spectrum of **1**.

Spectrum from FP3\_Negative.wiff (sample 1) - FP3\_Negative, Experiment 1, -TOF MS (100 - 1000) from 0.510 min

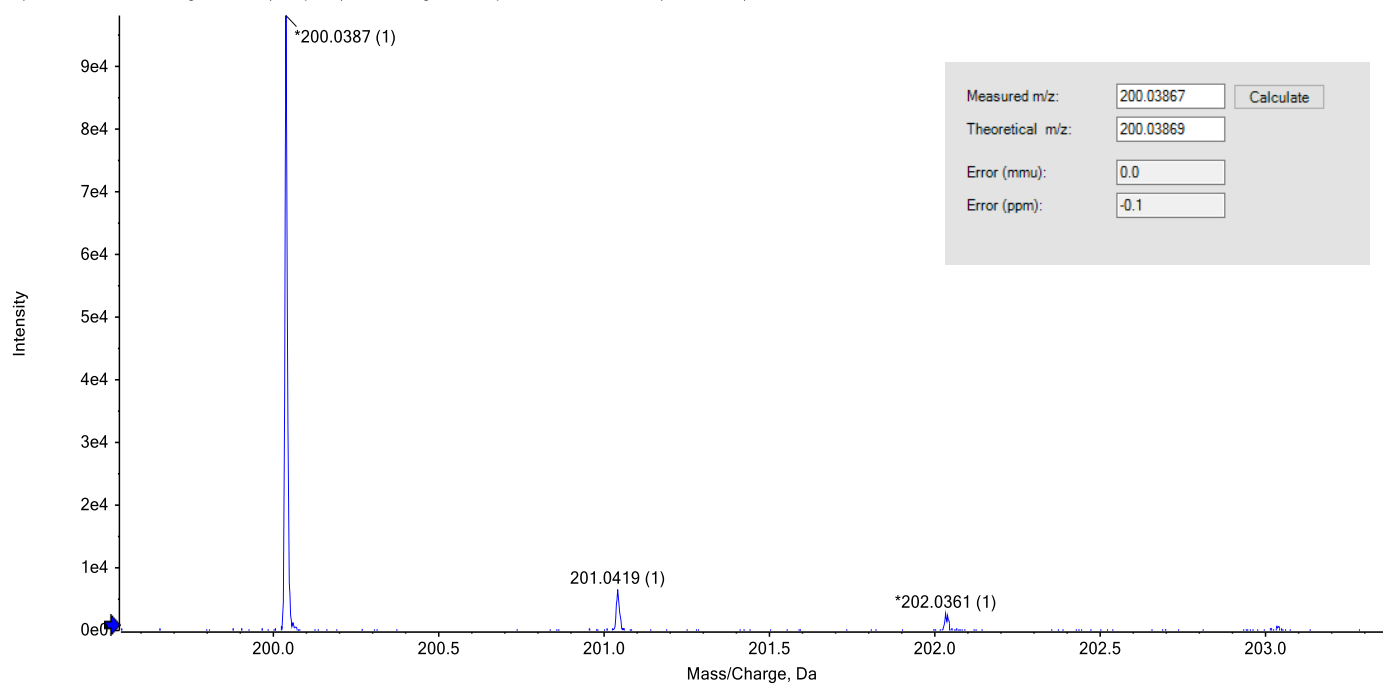

**Figure S8.** HR-ESI-MS data of **1**.

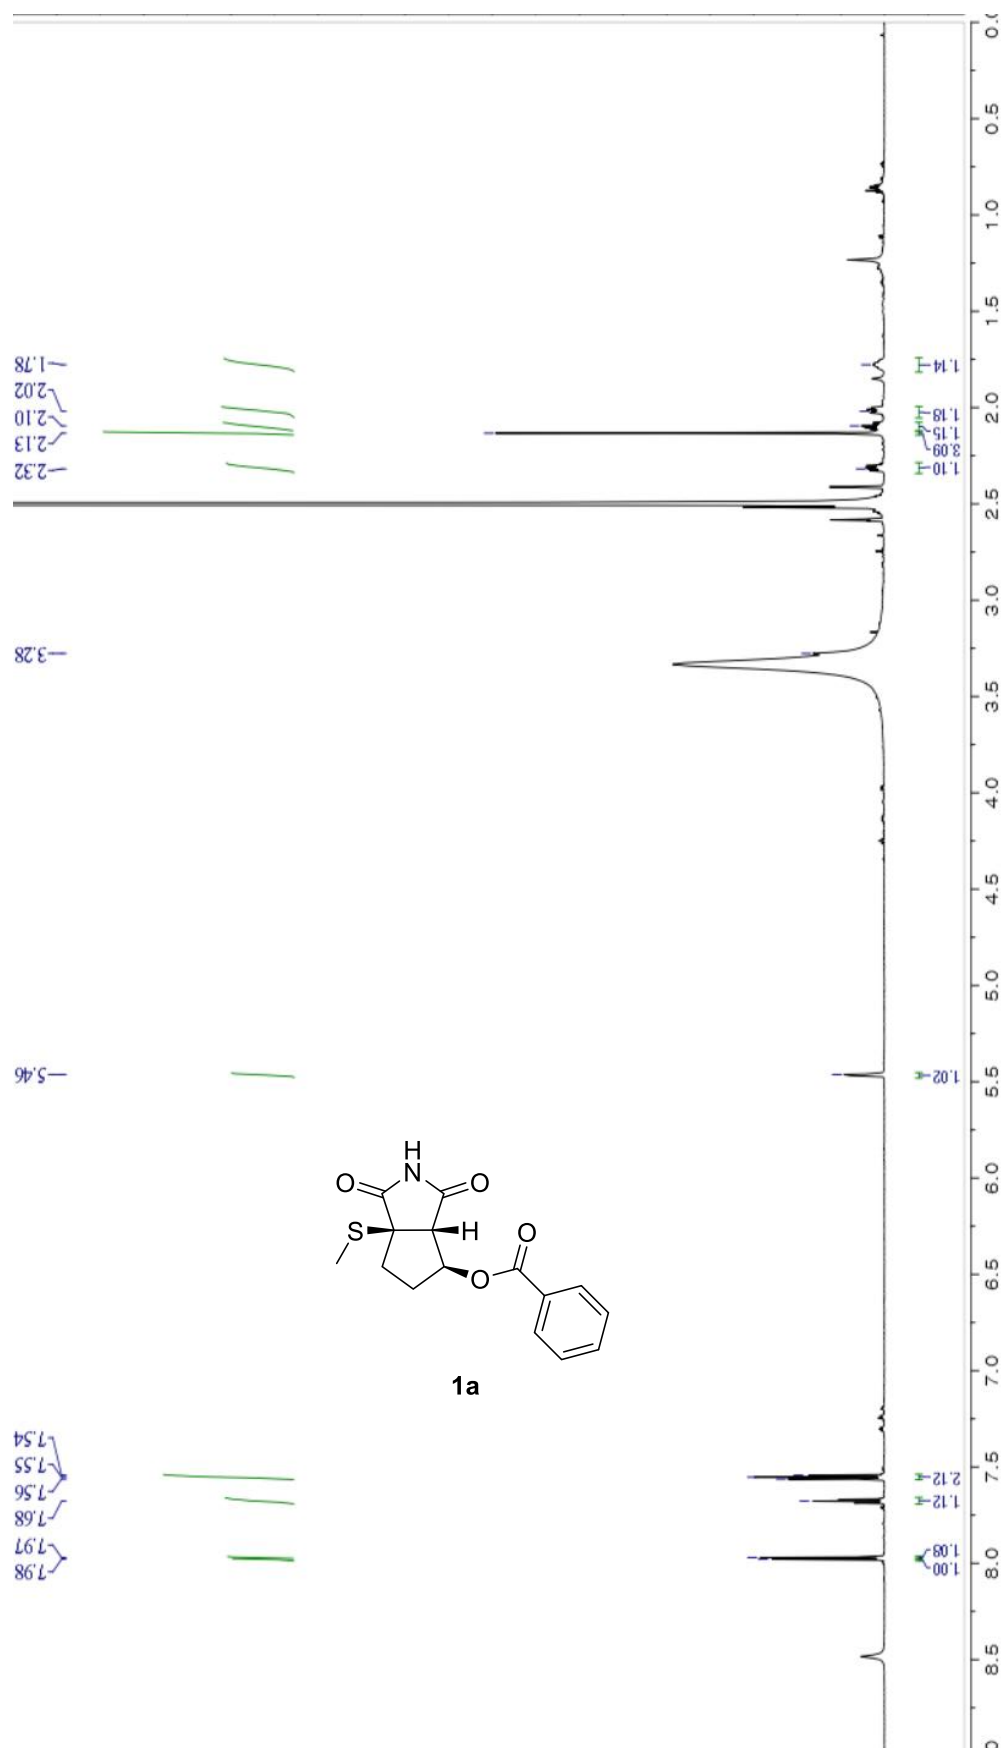

**Figure S9.** The  $^1\text{H}$  NMR (800 MHz,  $\text{DMSO}-d_6$ ) spectrum of **1a**.

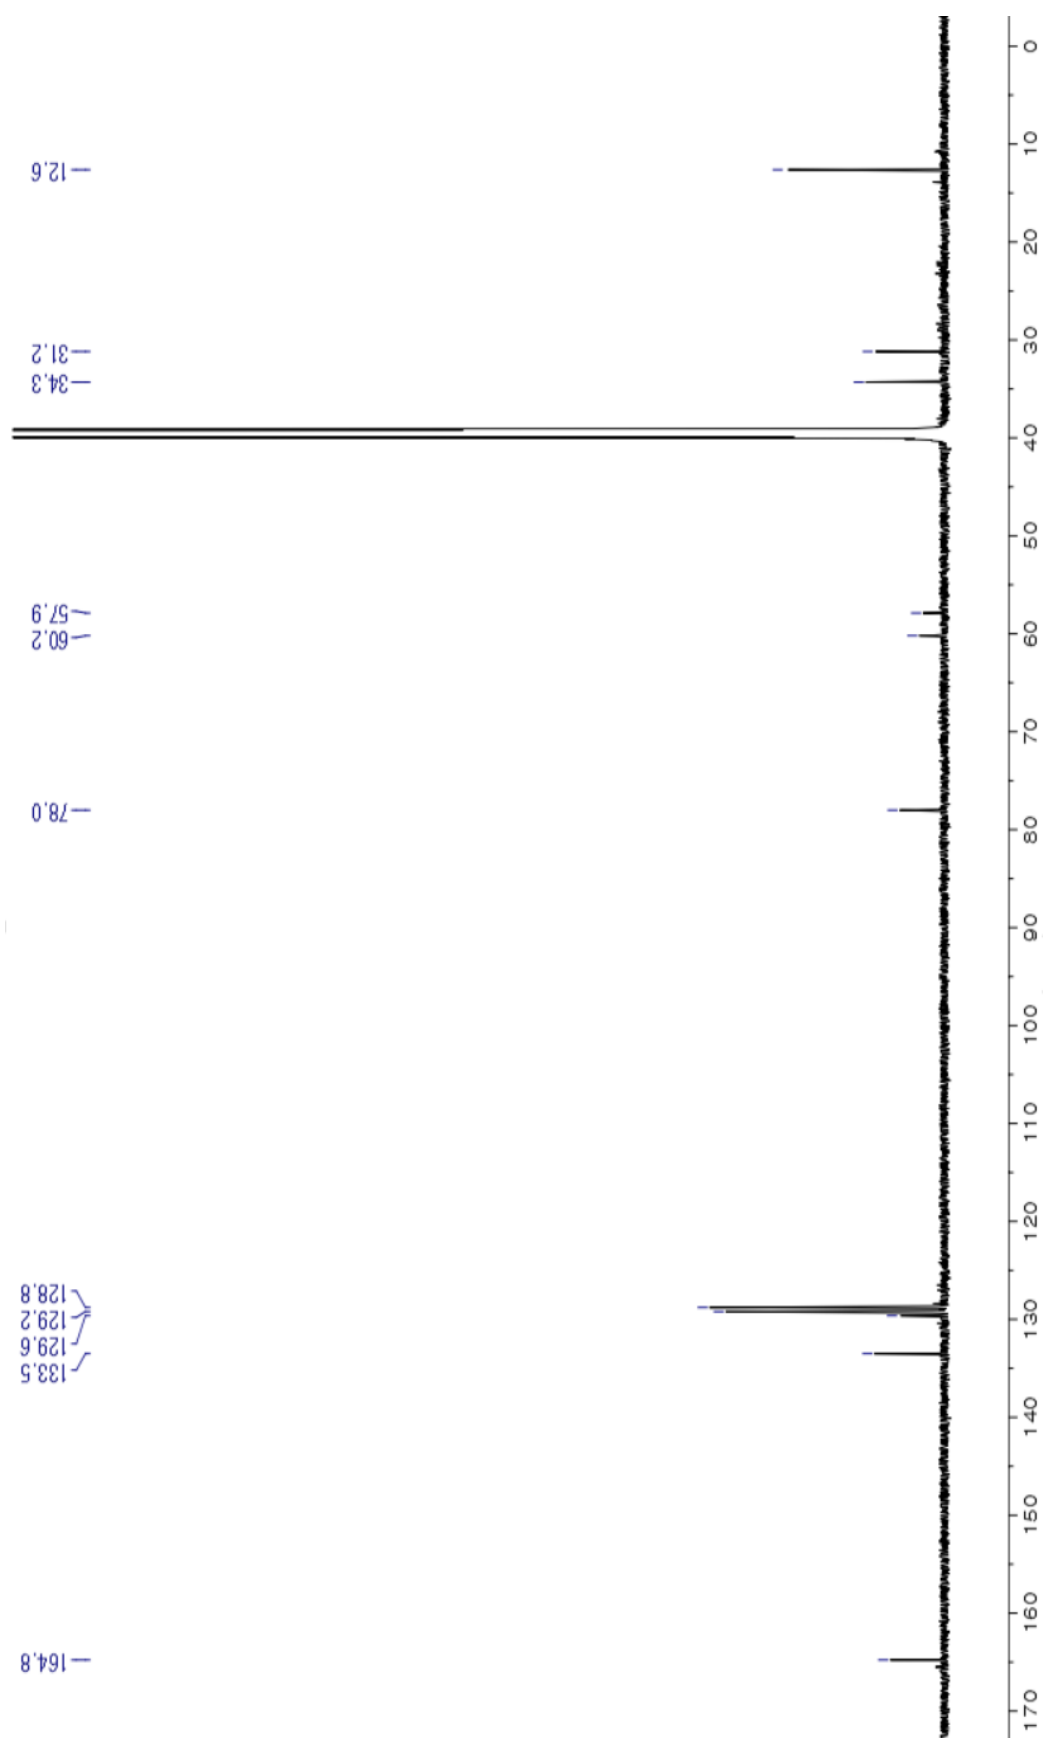

**Figure S10.** The  $^{13}\text{C}$  NMR (200 MHz,  $\text{DMSO}-d_6$ ) spectrum of **1a**.

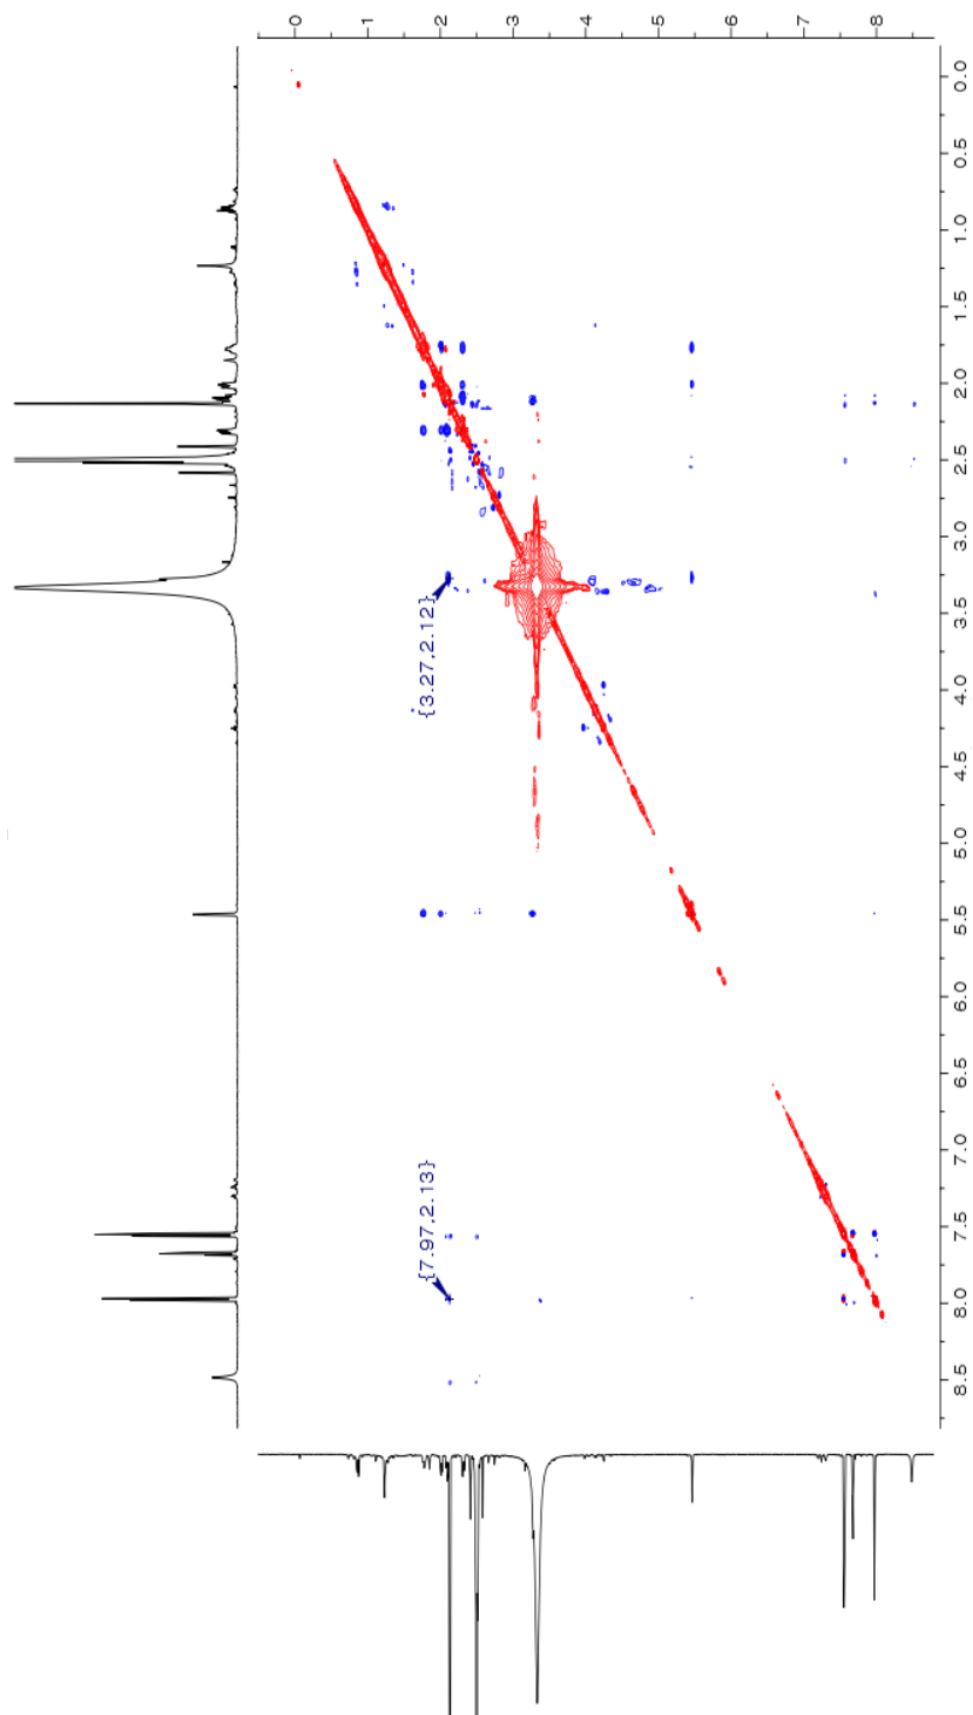

**Figure S11.** The NOESY (800 MHz, DMSO-*d*<sub>6</sub>) spectrum of **1a**.

Spectrum from B\_FP3.wiff (sample 1) - B\_FP3, Experiment 1, +TOF MS (100 - 2000) from 0.437 min

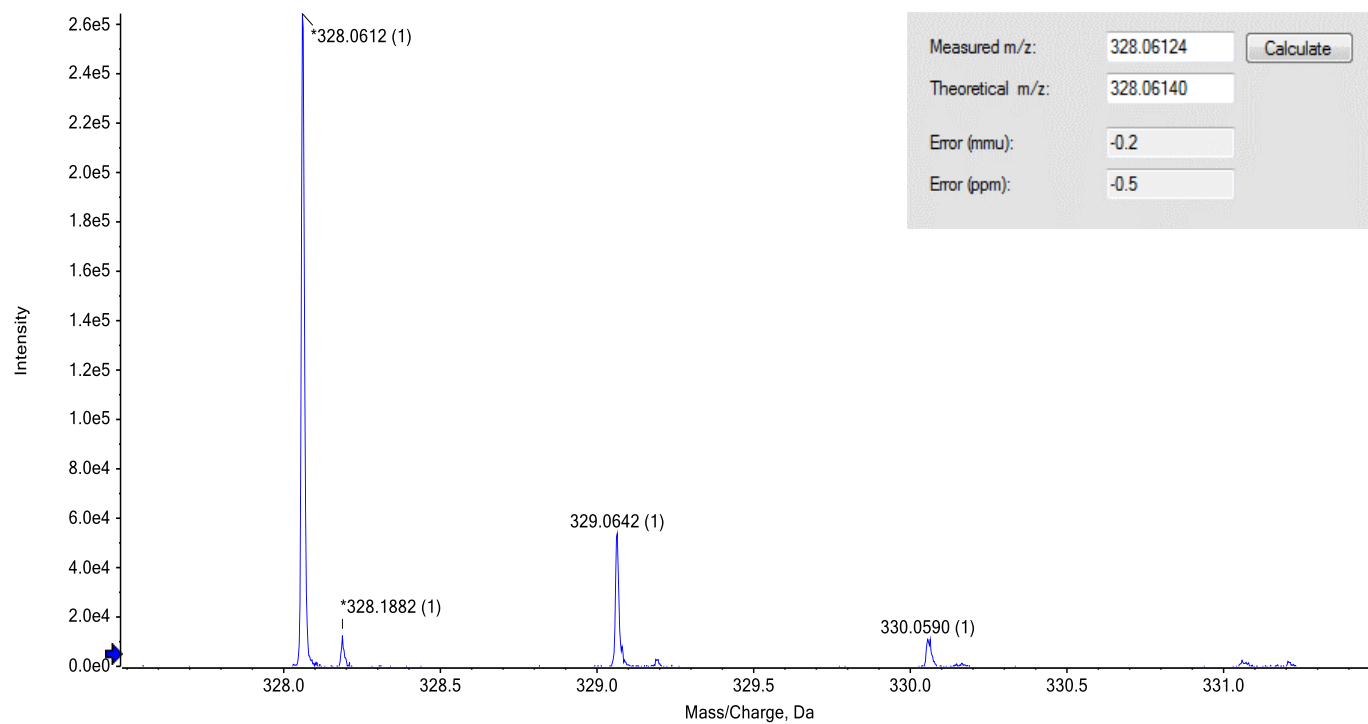

**Figure S12.** HR-ESI-MS data of **1a**.

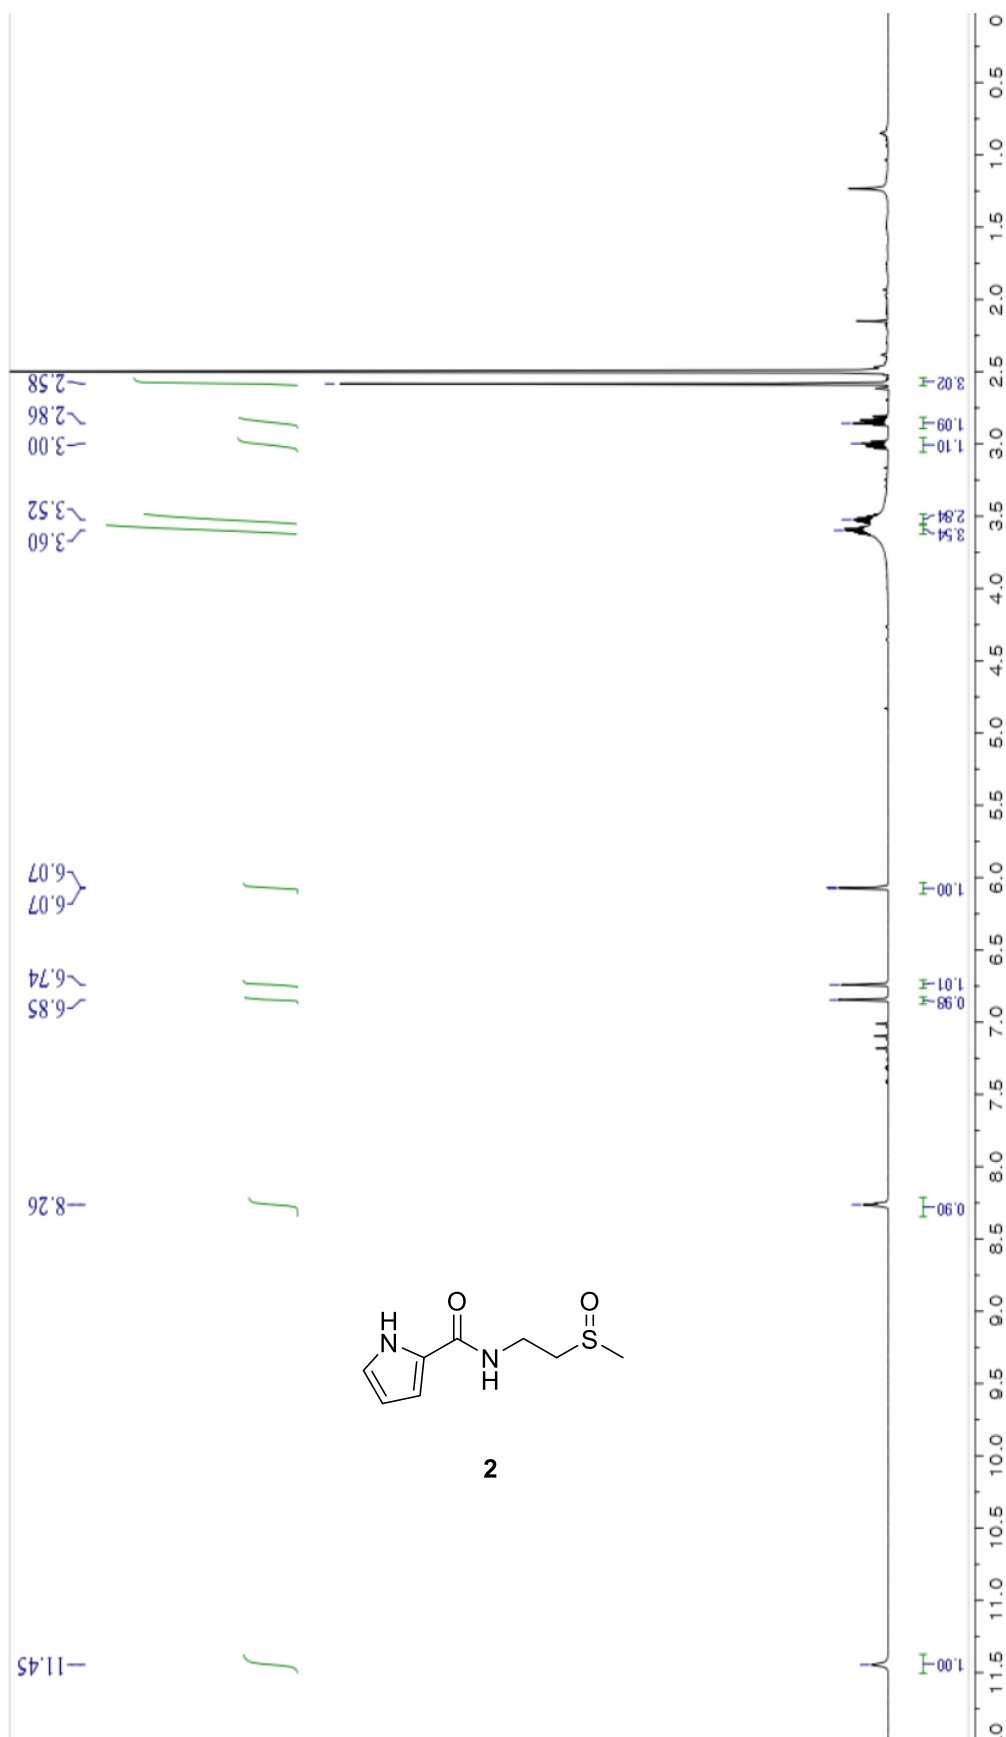

**Figure S13.** The <sup>1</sup>H NMR (600 MHz, DMSO-*d*<sub>6</sub>) spectrum of **2**.

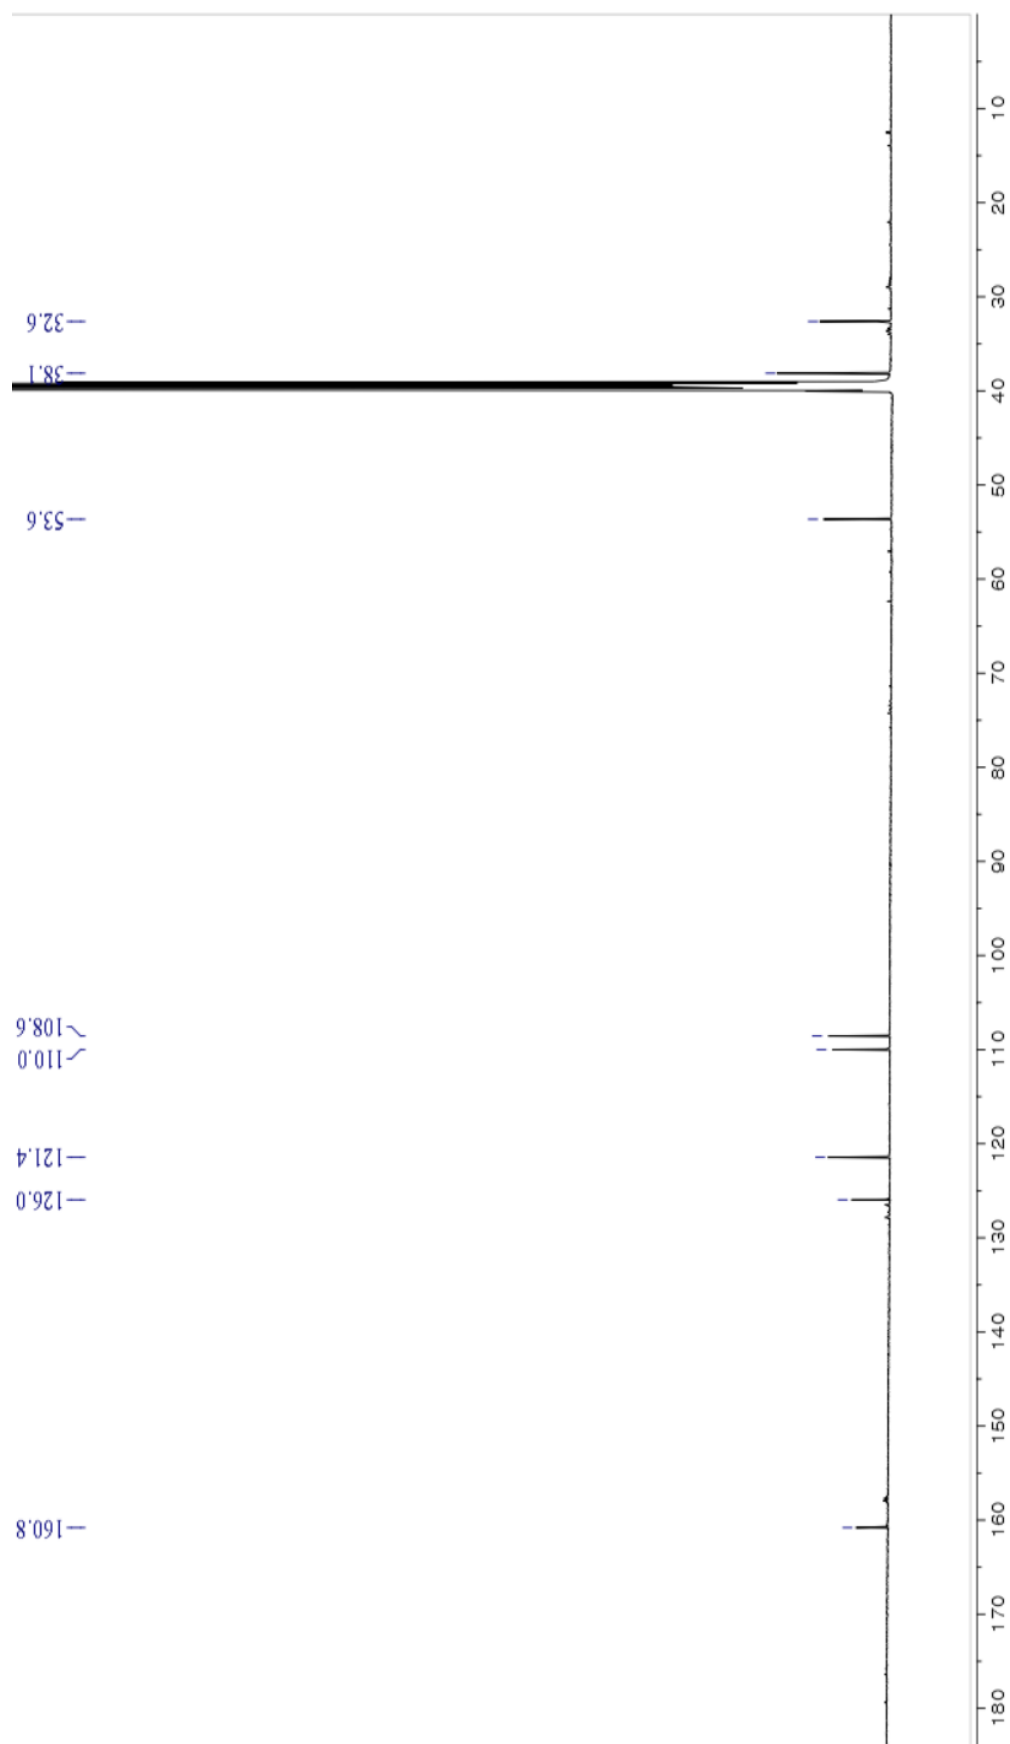

**Figure S14.** The  $^{13}\text{C}$  NMR (150 MHz,  $\text{DMSO-}d_6$ ) spectrum of **2**.

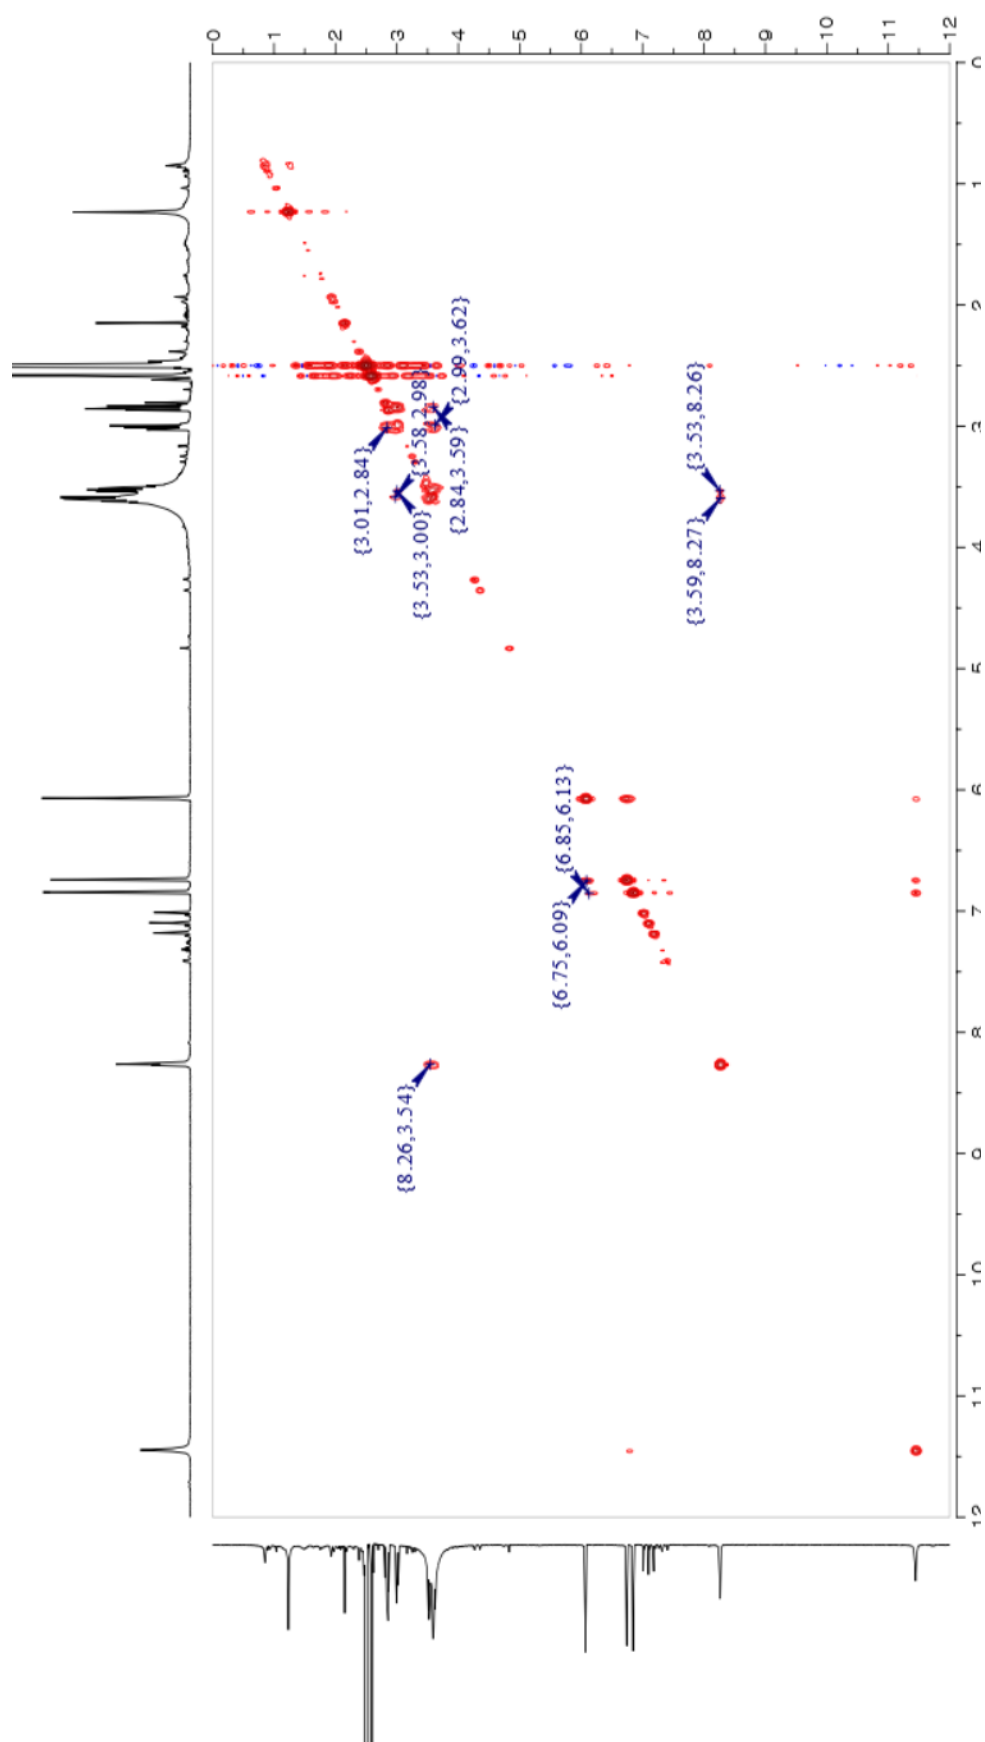

**Figure S15.** The COSY (600 MHz, DMSO-*d*<sub>6</sub>) spectrum of **2**.

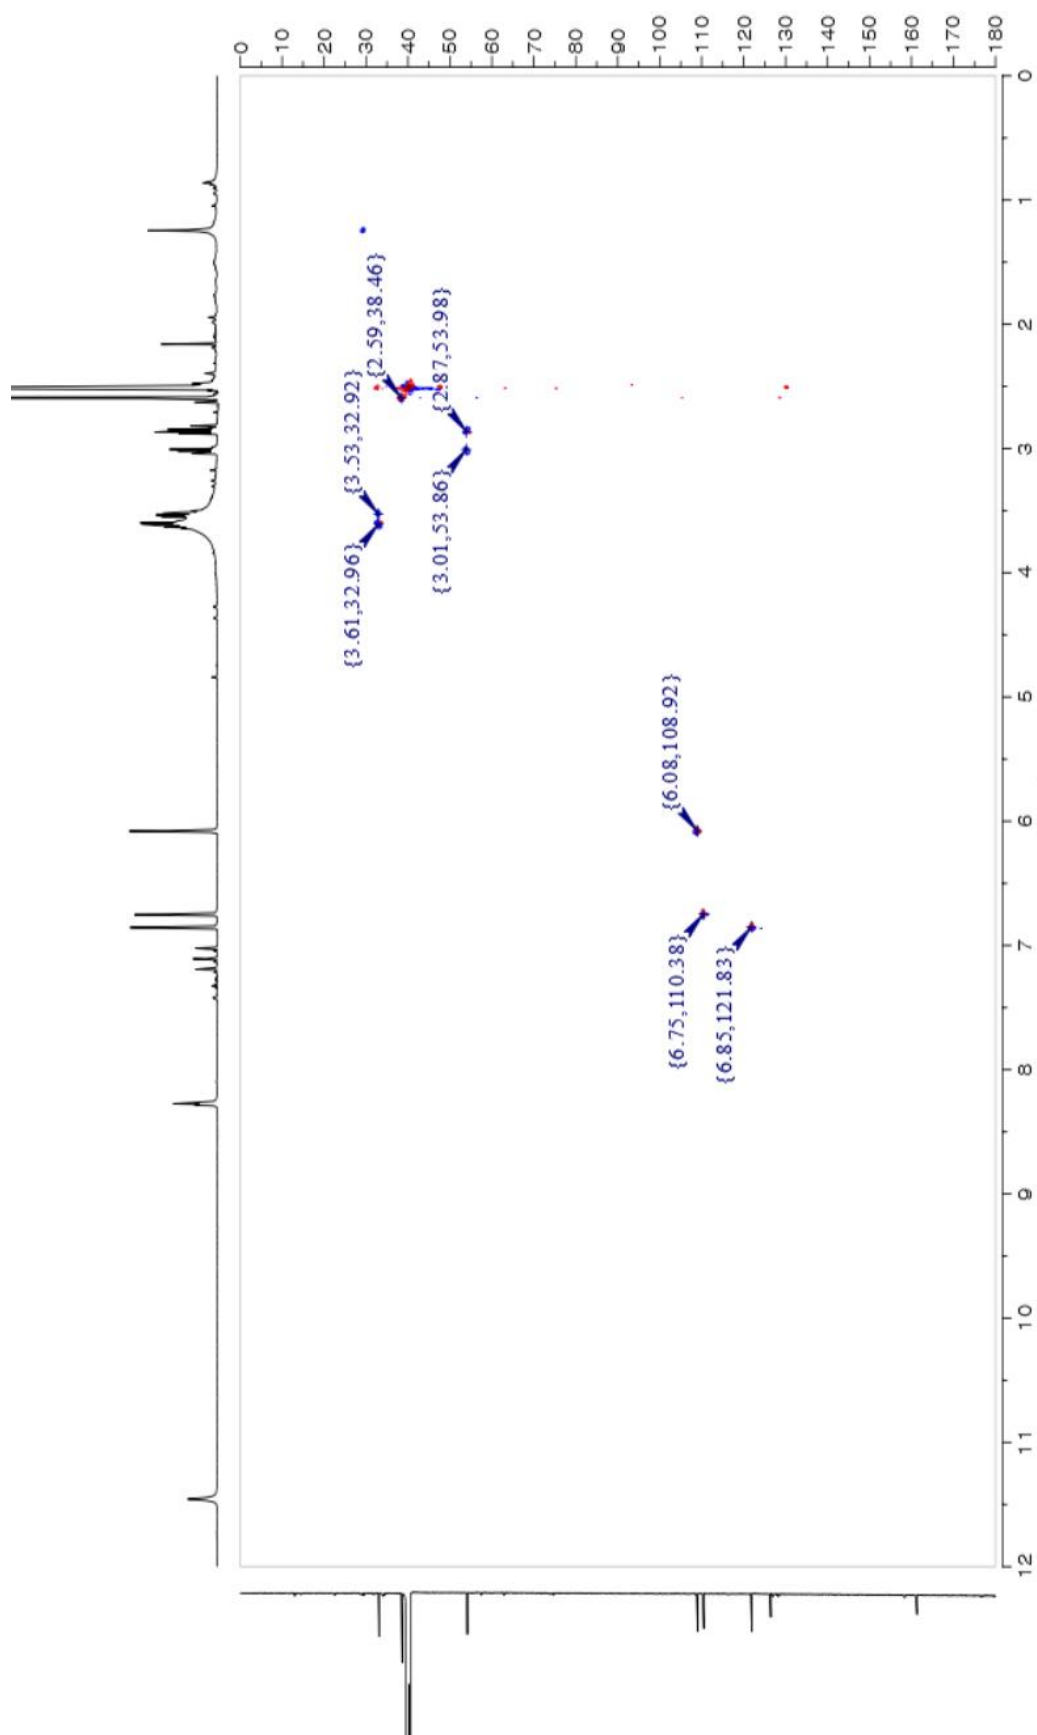

**Figure S16.** The HSQC (600 MHz, DMSO- $d_6$ ) spectrum of **2**.

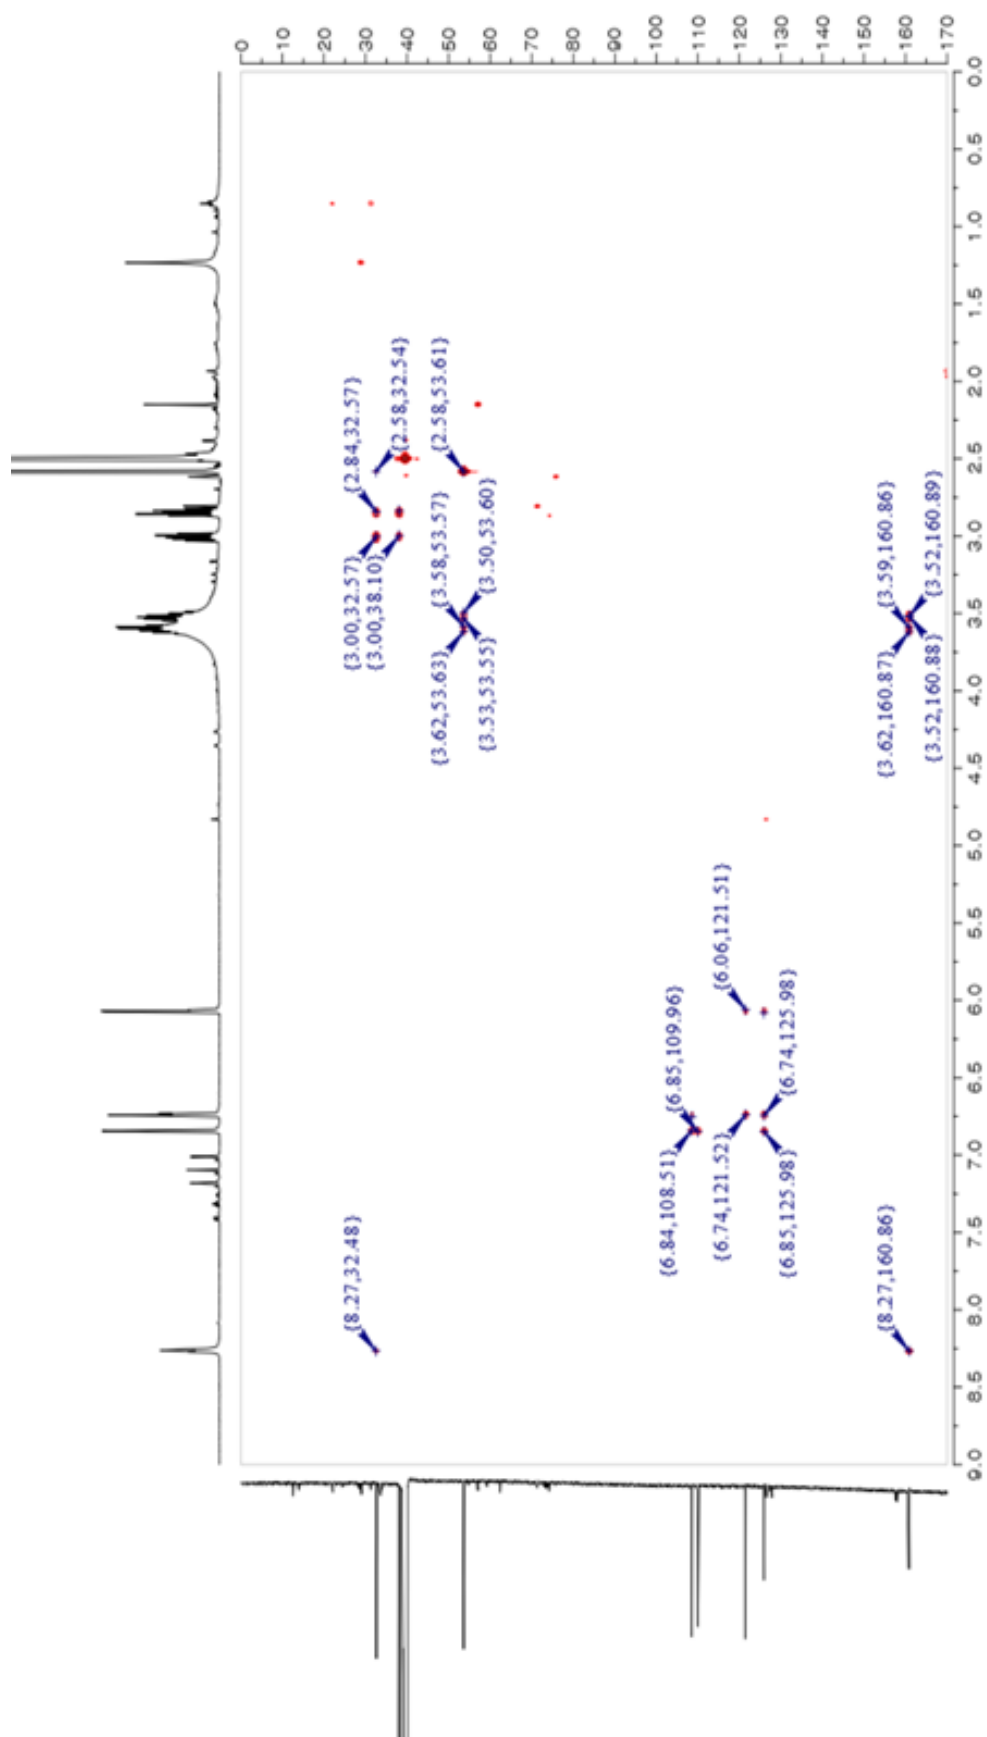

**Figure S17.** The HMBC (600 MHz, DMSO- $d_6$ ) spectrum of **2**.

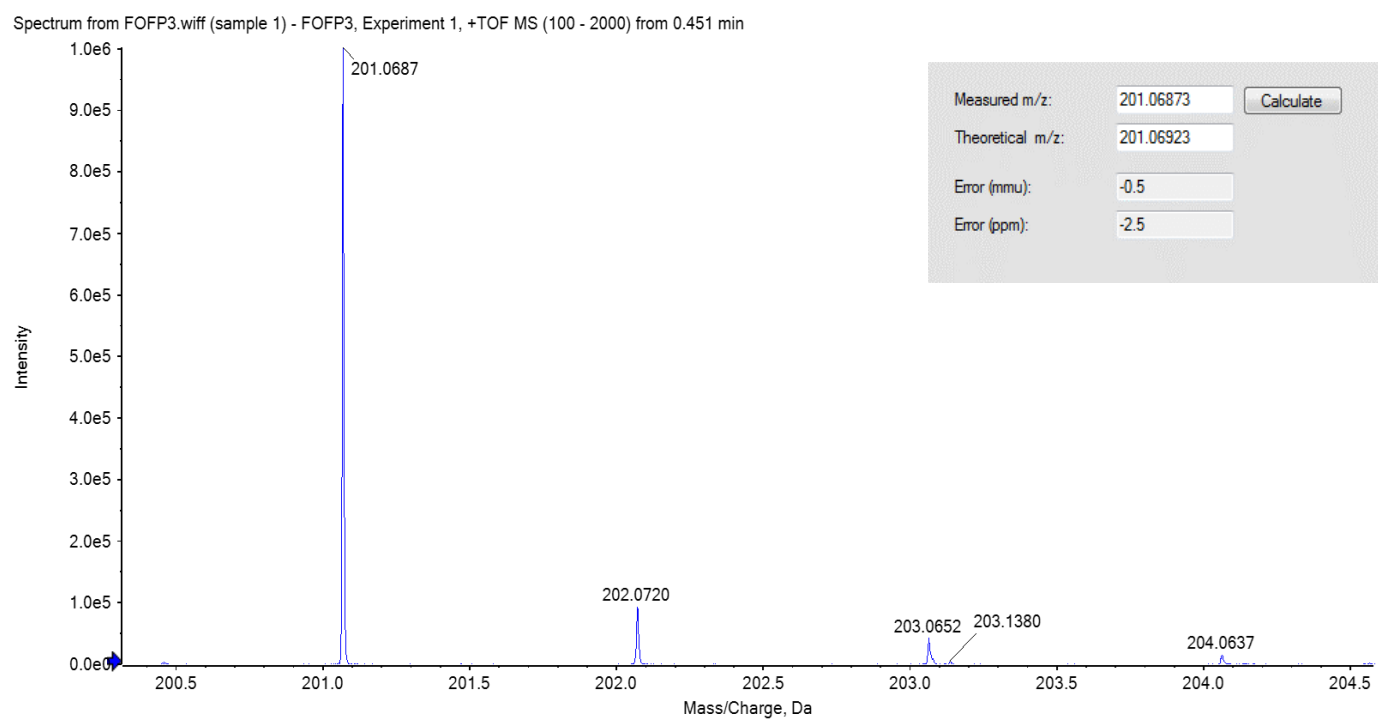

**Figure S18.** HR-ESI-MS data of **2**.

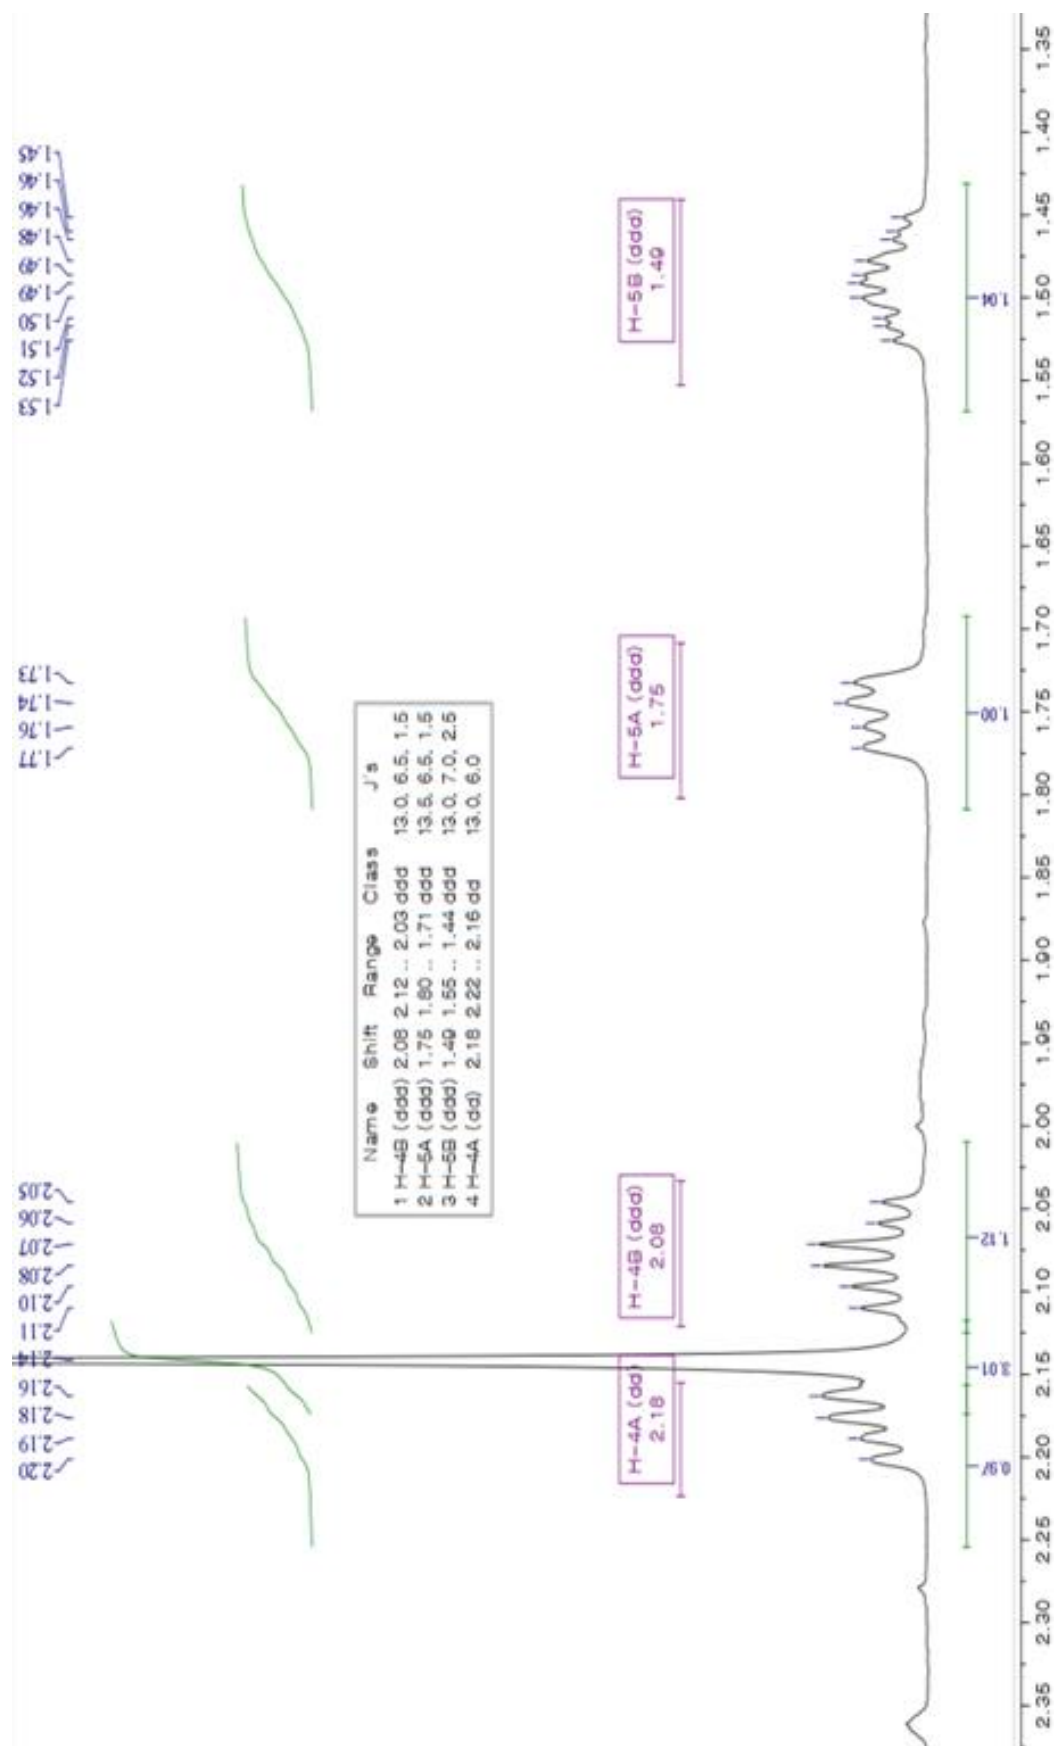

**Figure S19.** The  $^1\text{H}$  NMR (800 MHz,  $\text{DMSO}-d_6$ ) spectrum ( $\delta_{\text{H}}$  1.3 – 2.4 ppm) of **1**.

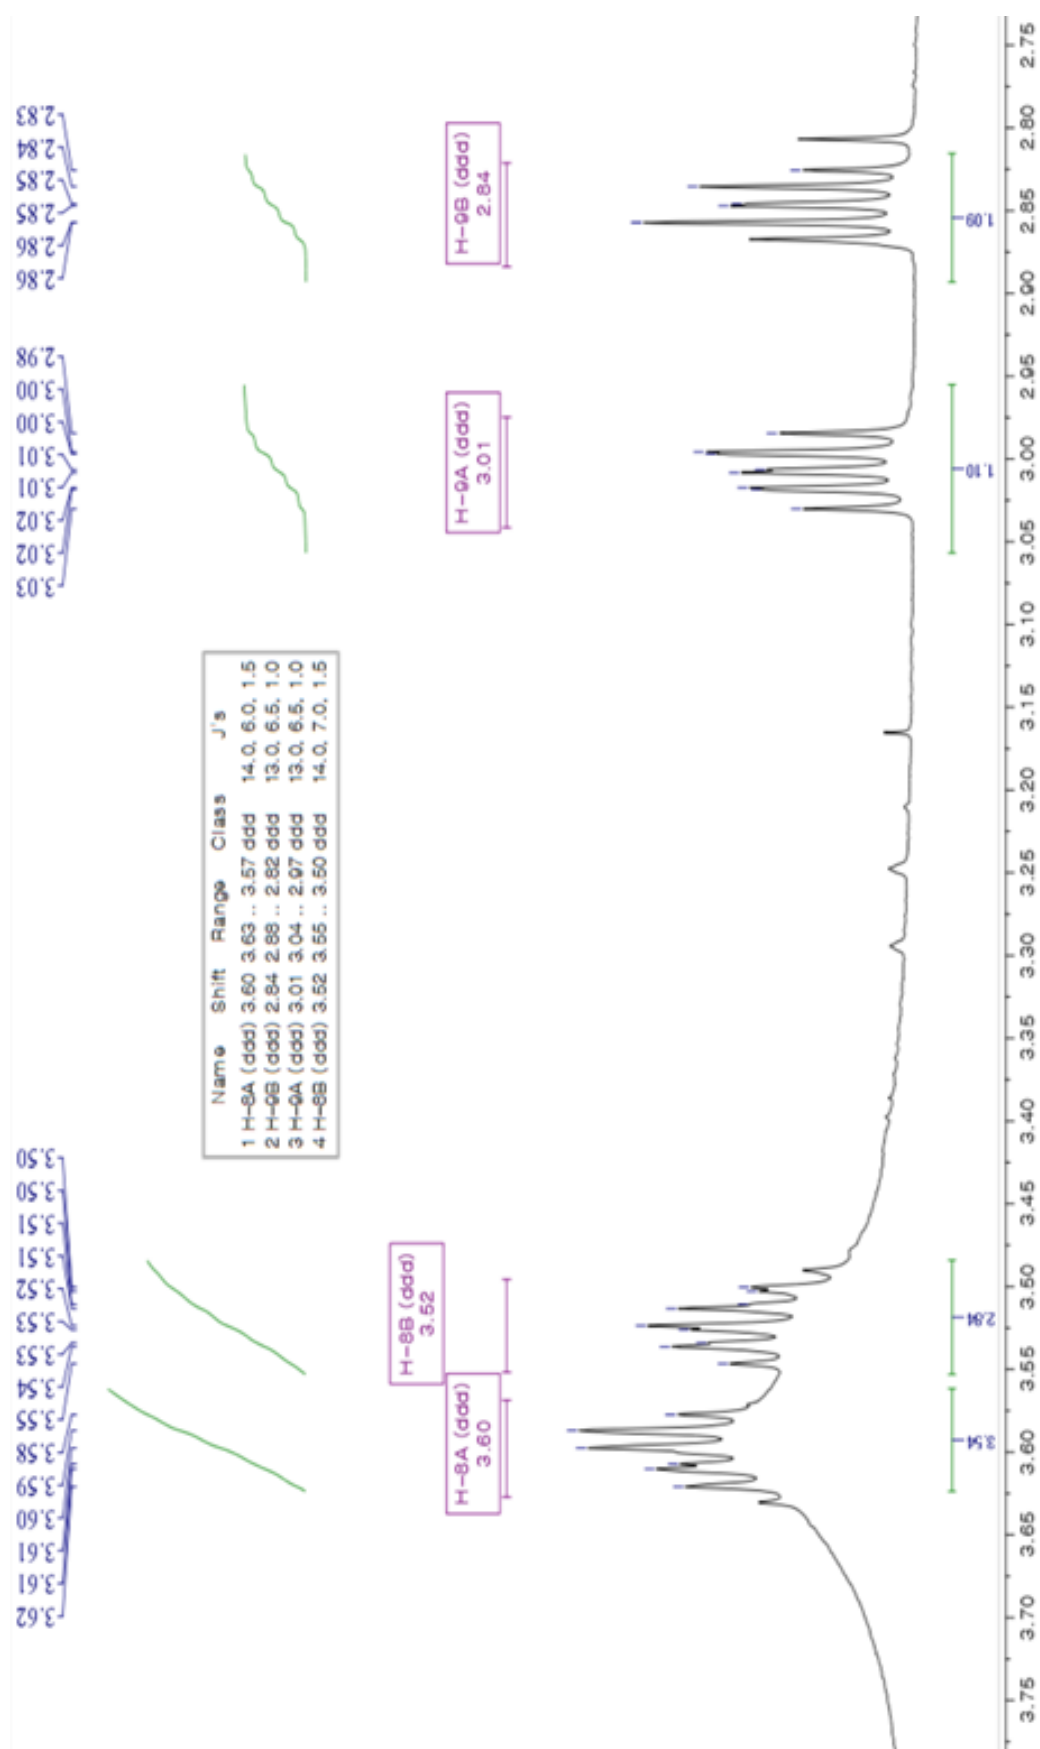

**Figure S20.** The  $^1\text{H}$  NMR (600 MHz,  $\text{DMSO}-d_6$ ) spectrum ( $\delta_{\text{H}}$  2.7 – 3.8 ppm) of **2**.
